# Supplementary material
Source: Springer Nature journal article supplement (https://www.springermedizin.de/resource/supplementary/12958_2003_9_MOESM3_ESM.pdf/9566378)

# BMP-4

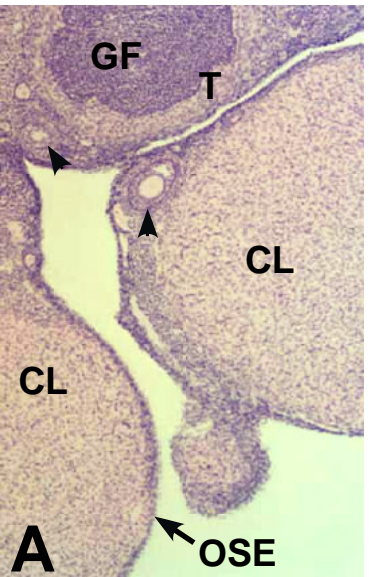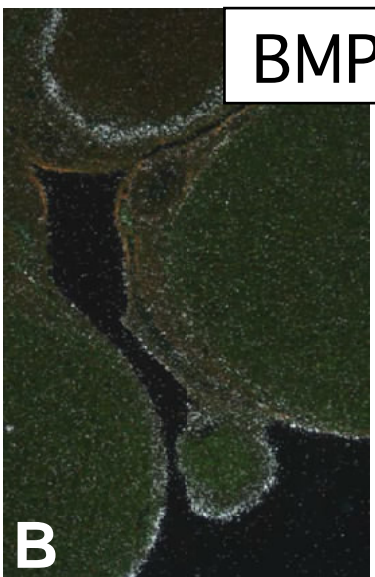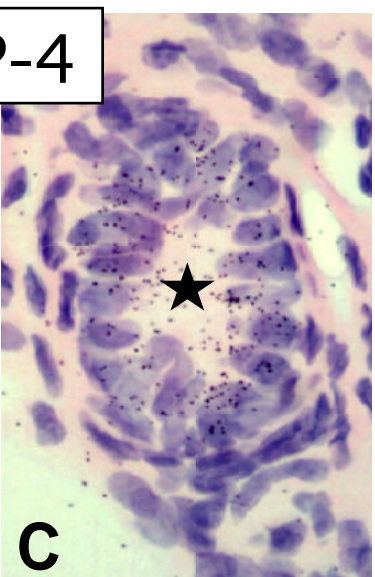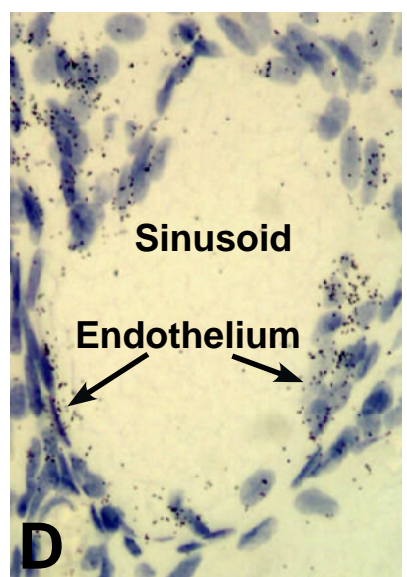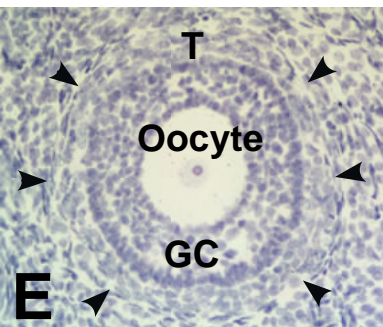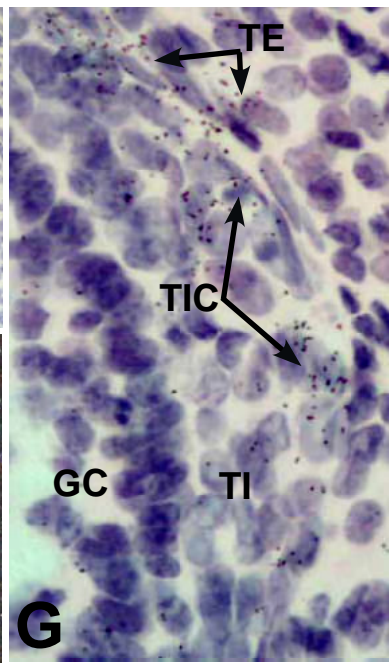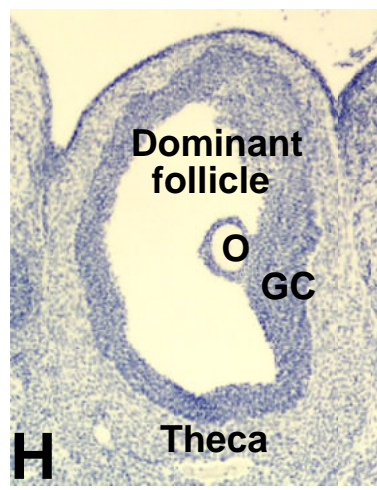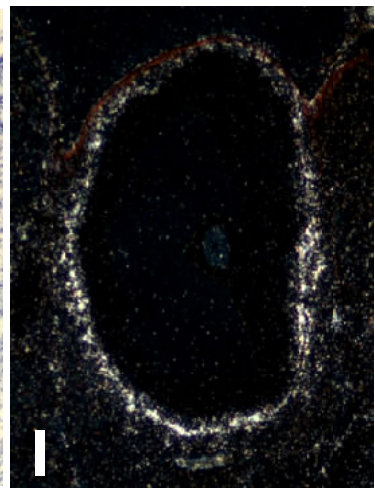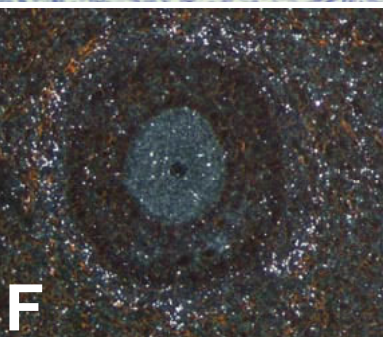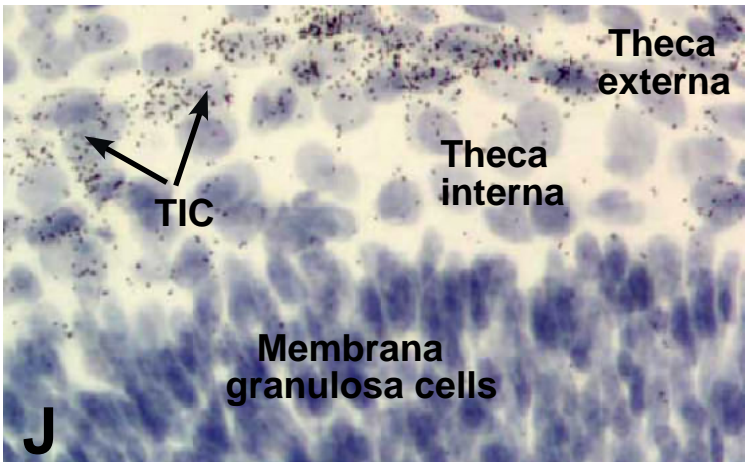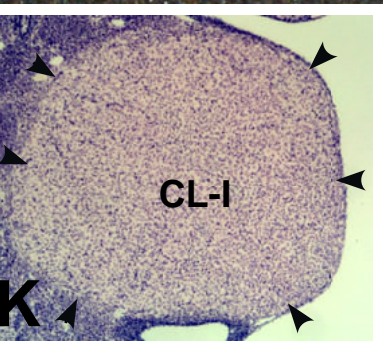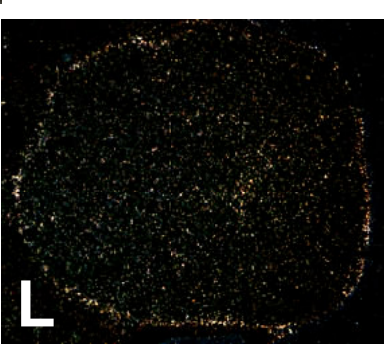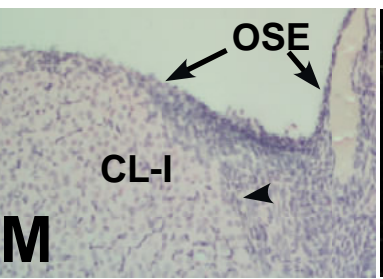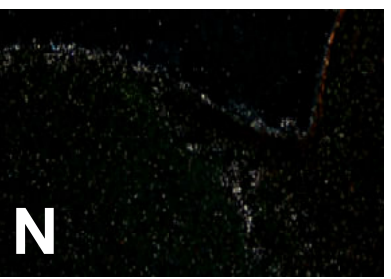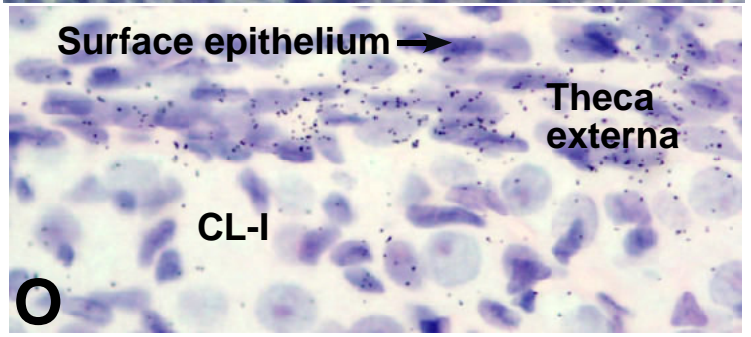

Supplement: MOESM3 [file 9566378]
